# Supplementary material for: The Reactivity of Polyethylene Microplastics in Water under Low Oxygen Conditions Using Radiation Chemistry
Source: MDPI journal article supplement (doi:10.3390/w13213120), 2021-11-05
Supplement: s1 [file s1]

Archive with 1 entries (1 files):
- water-1442769-supplementary.pdf
