# Supplementary material for: The Reactivity of Polyethylene Microplastics in Water under Low Oxygen Conditions Using Radiation Chemistry
Source: MDPI journal article supplement (doi:10.3390/w13213120), 2021-11-05
Supplement: s1 [file s1 › water-1442769-supplementary.pdf]

## The reactivity of polyethylene microplastics in water under low oxygen conditions using radiation chemistry

Julie R. Peller<sup>1\*</sup>, Stephen P. Mezyk<sup>2</sup>, Sarah Shidler<sup>3</sup>, Joe Castleman<sup>1</sup>, Scott Kaiser<sup>1</sup> and Gregory P. Horne<sup>4</sup>

### Supplemental Material

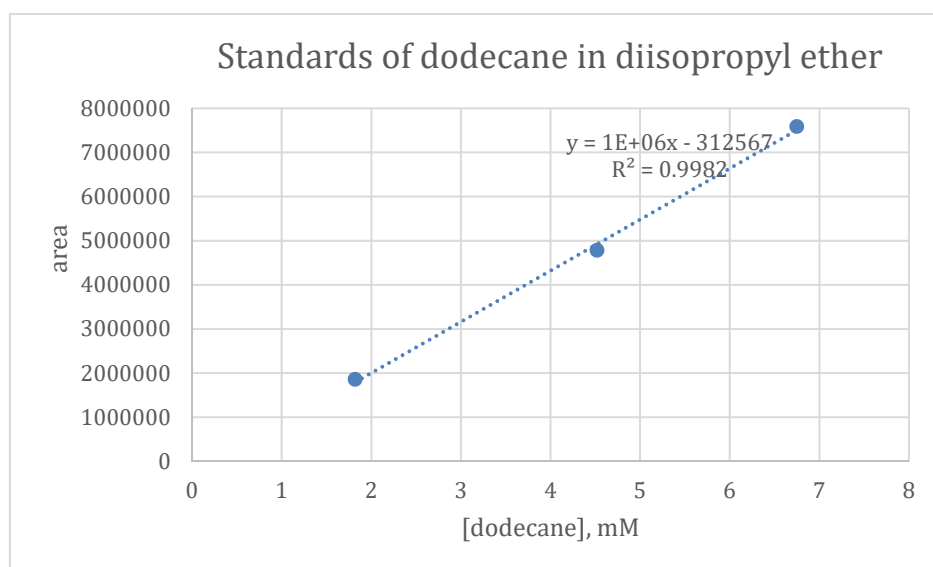

Figure S1. Standard graph of dodecane [mM] in diisopropyl ether.

### Additional chromatograms of extracted compounds (SPME) of irradiated PE

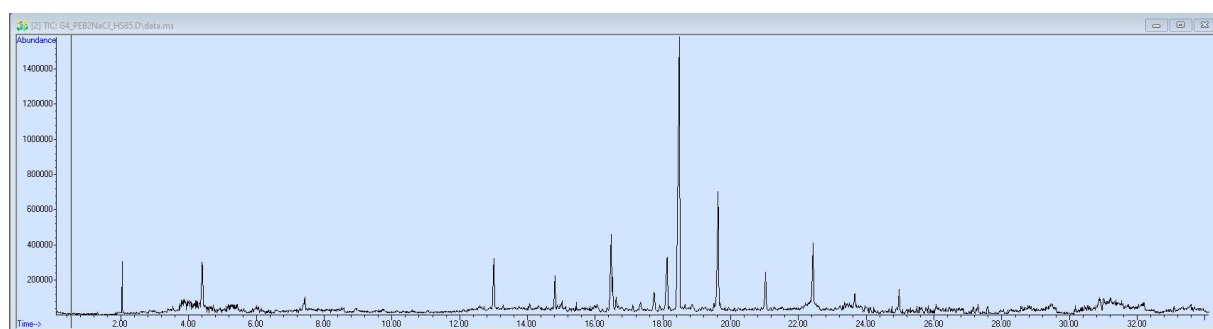

Figure S2. PE (as received) in salt water (0.5M), irradiation dose of ~0.5 MGy.

Table S1. Identified Peaks from Figure S2, using purchased standards.

| Retention time, min | Compound             |
|---------------------|----------------------|
| 13.013              | <i>n</i> -dodecane   |
| 14.819              | <i>n</i> -tridecane  |
| 18.108              | <i>n</i> -hexadecane |

|        |                      |
|--------|----------------------|
| 19.618 | 2-dodecanone         |
| 21.050 | <i>n</i> -nonadecane |

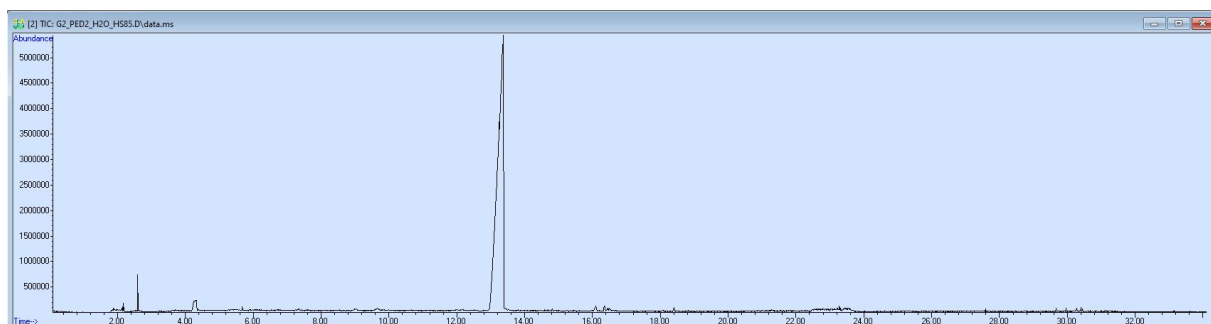

Figure S3. PE (as received) in water, irradiation dose of ~1.5 MGy. Largest peak is *n*-dodecane.

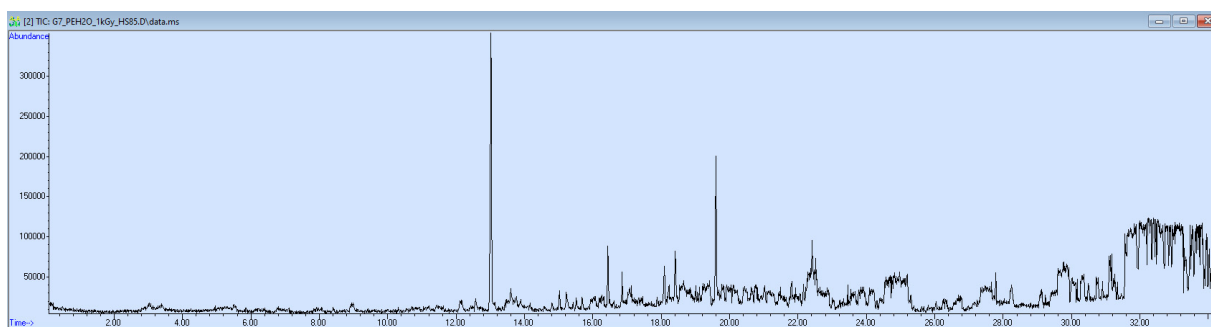

Figure S4. PE (heat-treated) in Lake Michigan water, irradiation dose of ~0.5 MGy. Largest peak is *n*-dodecane.

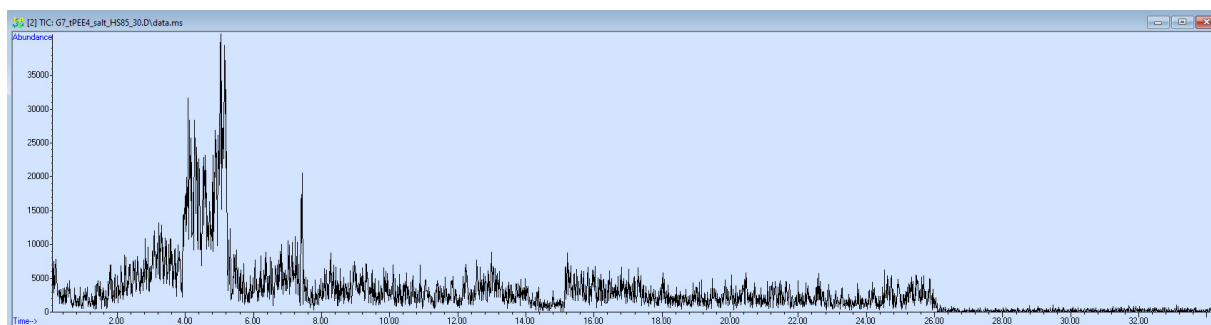

Figure S5. PE (heat-treated) in salt water, irradiation dose of ~2.0 MGy. No detectable compounds.

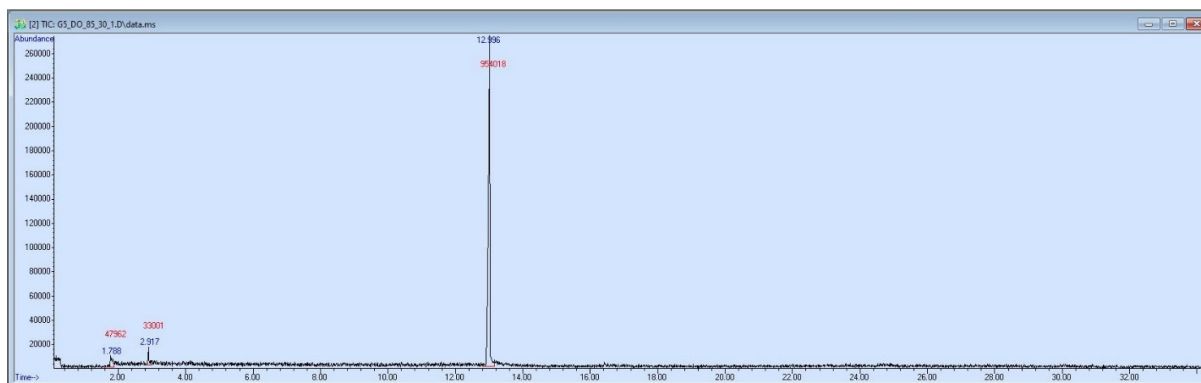

Figure S6. Chromatogram of *n*-dodecane (3.8 mg/L, maximum solubility) in water without PE present. Compiled data are shown in Figure 3. The integrated area is 954,018.

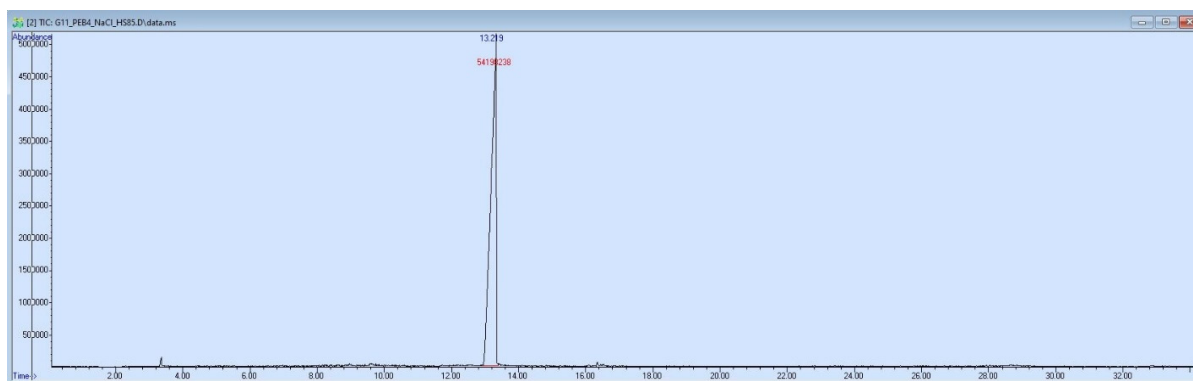

Figure S7. Chromatogram of *n*-dodecane in a saltwater mixture containing “as received” PE irradiated for ~0.5 MGy. Compiled data are shown in Figure 3. The integrated area is 54,198,238.

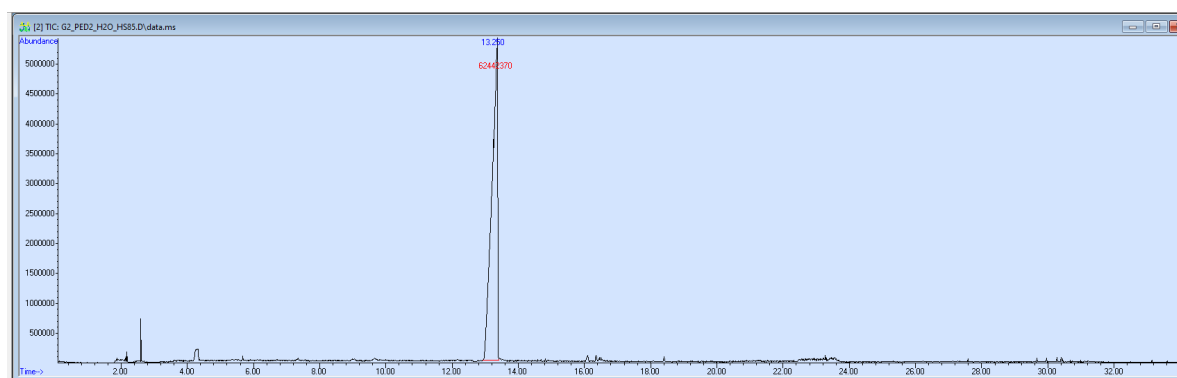

Figure S8. Chromatogram of *n*-dodecane in a water mixture containing “as received” PE irradiated for ~2.0 MGy. Compiled data are shown in Figure 3. The integrated area is 62,442,370.

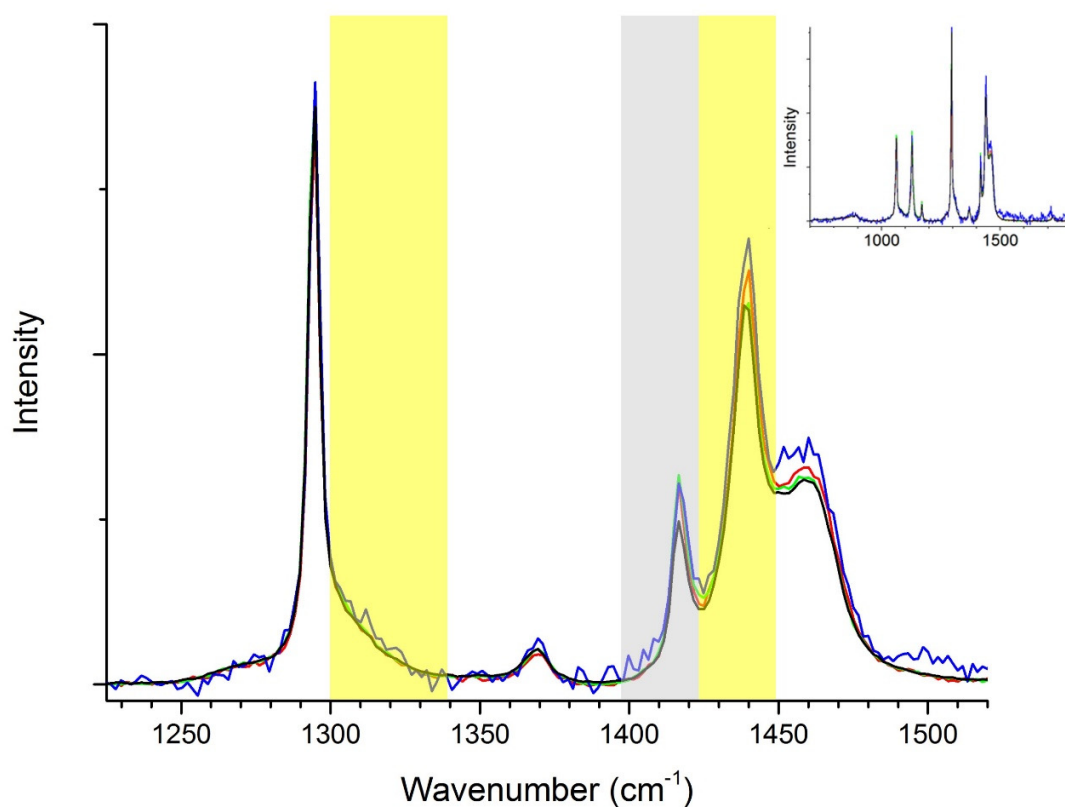

Figure S9. Baseline subtracted high resolution Raman spectra showing the CH<sub>2</sub> twisting, and CH<sub>2</sub> bending bands of gamma irradiated PE in fresh water (**red trace**), salt water (**green trace**), and Lake Michigan water (**blue trace**) showing minimal changes in comparison to the stock PE (**black trace**). Raman bands indicative of crystalline phase PE are highlighted in grey and bands indicating amorphous phase PE are highlighted in yellow.
